# Supplementary material
Source: publisher figshare collection journal article supplement (https://acs.figshare.com/ndownloader/files/18009713)
Supplement: Supplementary file 1 [file 18009713]

## Supporting Information

### Light-Switchable One-Dimensional Photonic Crystals based on MOFs with Photomodulatable Refractive Index

*Zejun Zhang,<sup>a,#</sup> Kai Müller,<sup>a,#</sup> Shahriar Heidrich,<sup>b,#</sup> Meike Koenig,<sup>a</sup> Tawheed Hashem,<sup>a</sup> Tobias Schlöder,<sup>b</sup> David Bléger,<sup>c</sup> Wolfgang Wenzel,<sup>b</sup> Lars Heinke<sup>a,\*</sup>*

<sup>a</sup> Institute of Functional Interfaces (IFG), Karlsruhe Institute of Technology (KIT), Hermann-von-Helmholtz-Platz 1, 76344 Eggenstein-Leopoldshafen, Germany.

<sup>b</sup> Institute of Nanotechnology (INT), KIT, Hermann-von-Helmholtz-Platz 1, 76344 Eggenstein-Leopoldshafen, Germany.

<sup>c</sup> Department of Chemistry & IRIS Adlershof Humboldt-Universität zu Berlin, 12489 Berlin, Germany. Present affiliation: Evonik Creavis GmbH, Paul-Baumann-Straße 1, 45772 Marl, Germany.

<sup>#</sup> These authors contributed equally.

#### IRRAS Data

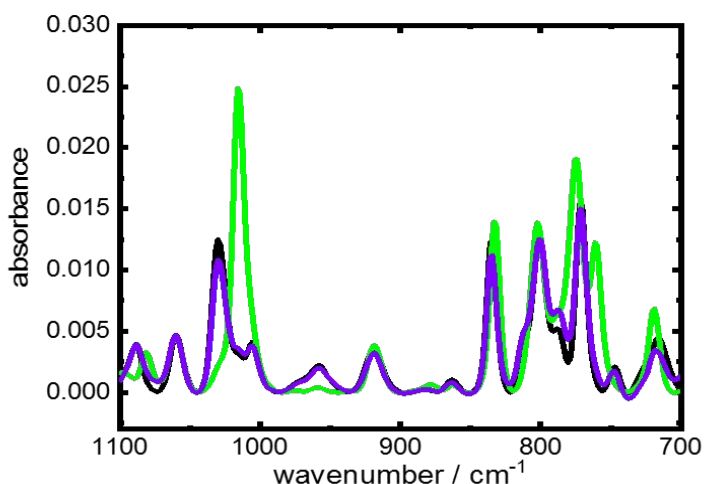

Figure SI1: Infrared spectra of the thermally relaxed sample (black, 100% *trans*), upon 530 nm (green, *cis*) and upon 400 nm (violet, *trans*) irradiation. The black and violet spectra are almost identical.

## Experimental Spectroscopic Ellipsometry Data

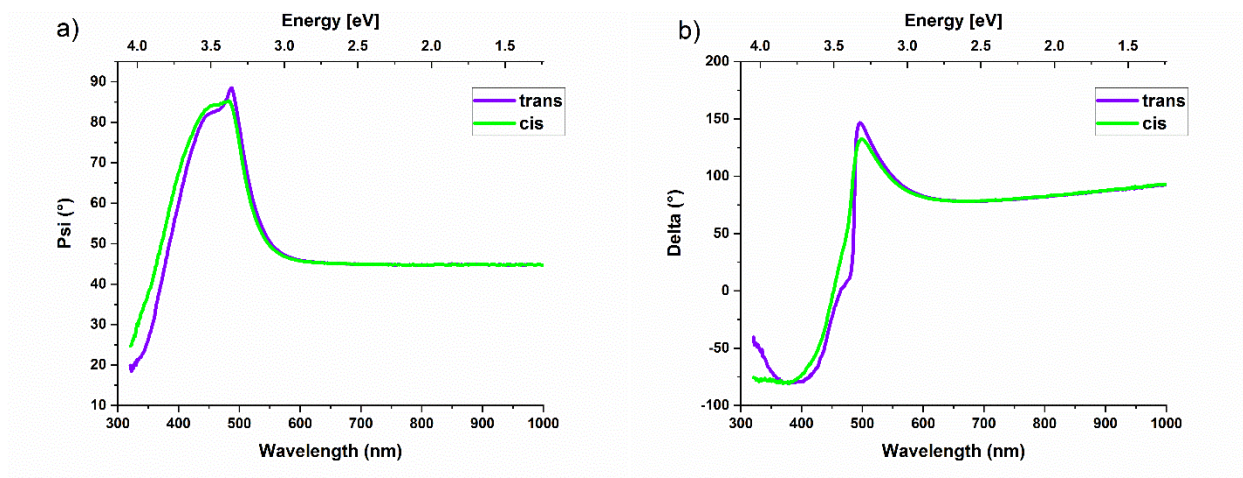

Figure S12: Raw experimental spectra of the ellipsometric angles Psi (a) and Delta (b) of the photoswitchable SURMOF after irradiation with green (*cis*) and violet (*trans*) light.

### ***DFT Calculations***

Table SII: Calculated excitation energies, oscillator strengths and main molecular orbital transition contributions for the two F<sub>2</sub>AzoBDCH<sub>2</sub> isomers.

|              | Energy / eV | Energy / nm | Oscillator strength / a.u. | Main contribution   |
|--------------|-------------|-------------|----------------------------|---------------------|
| <i>trans</i> |             |             |                            |                     |
| 1            | 2.38439     | 519.983     | 0.00239                    | HOMO → LUMO (94%)   |
| 2            | 3.57726     | 346.589     | 0.01471                    | HOMO → LUMO+1 (92%) |
| 3            | 3.78861     | 327.255     | 0.58989                    | HOMO-1 → LUMO (87%) |
| <i>cis</i>   |             |             |                            |                     |
| 1            | 2.65216     | 467.484     | 0.03585                    | HOMO → LUMO (77%)   |
| 2            | 3.34871     | 370.244     | 0.01449                    | HOMO → LUMO+1 (77%) |
| 3            | 3.96250     | 312.894     | 0.00488                    | HOMO-1 → LUMO (95%) |

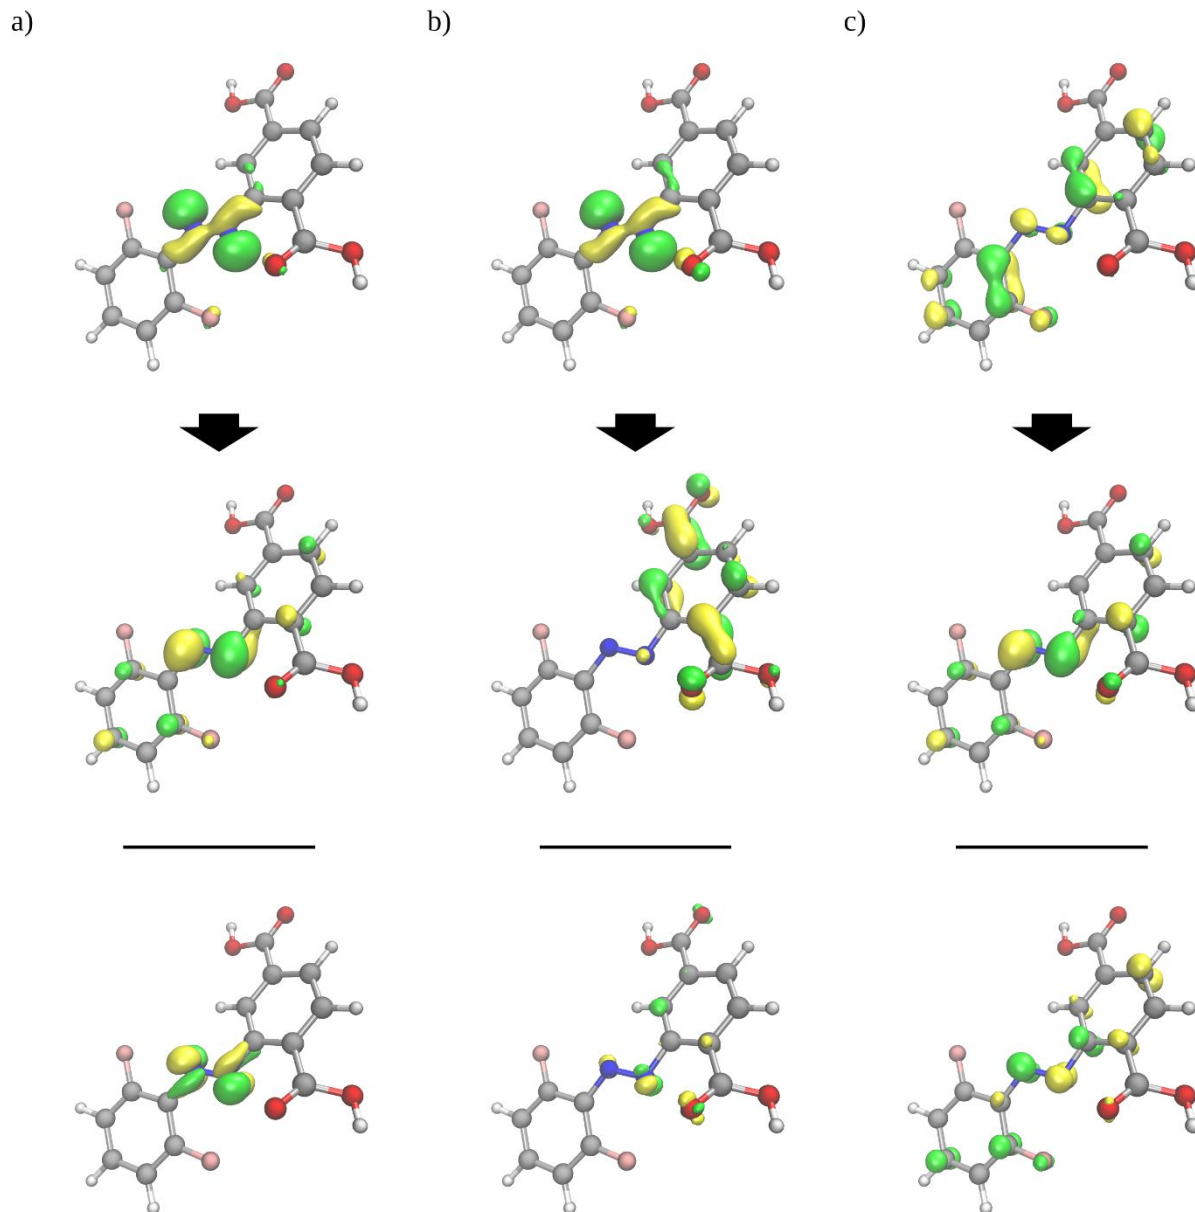

Figure SI3: Calculated transition orbitals and transition densities for the three lowest-lying excitations of *trans*-F<sub>2</sub>AzoBDCH<sub>2</sub>. (a), (b) and (c) correspond to excitations 1, 2 and 3, respectively, in Table SI1. Holes resulting from the excitations are shown in the upper row, the corresponding electrons in the middle row. Yellow and green indicate negative and positive phase, respectively. The bottom row shows the associated transition densities. Here, yellow and green indicate negative and positive phase, respectively.

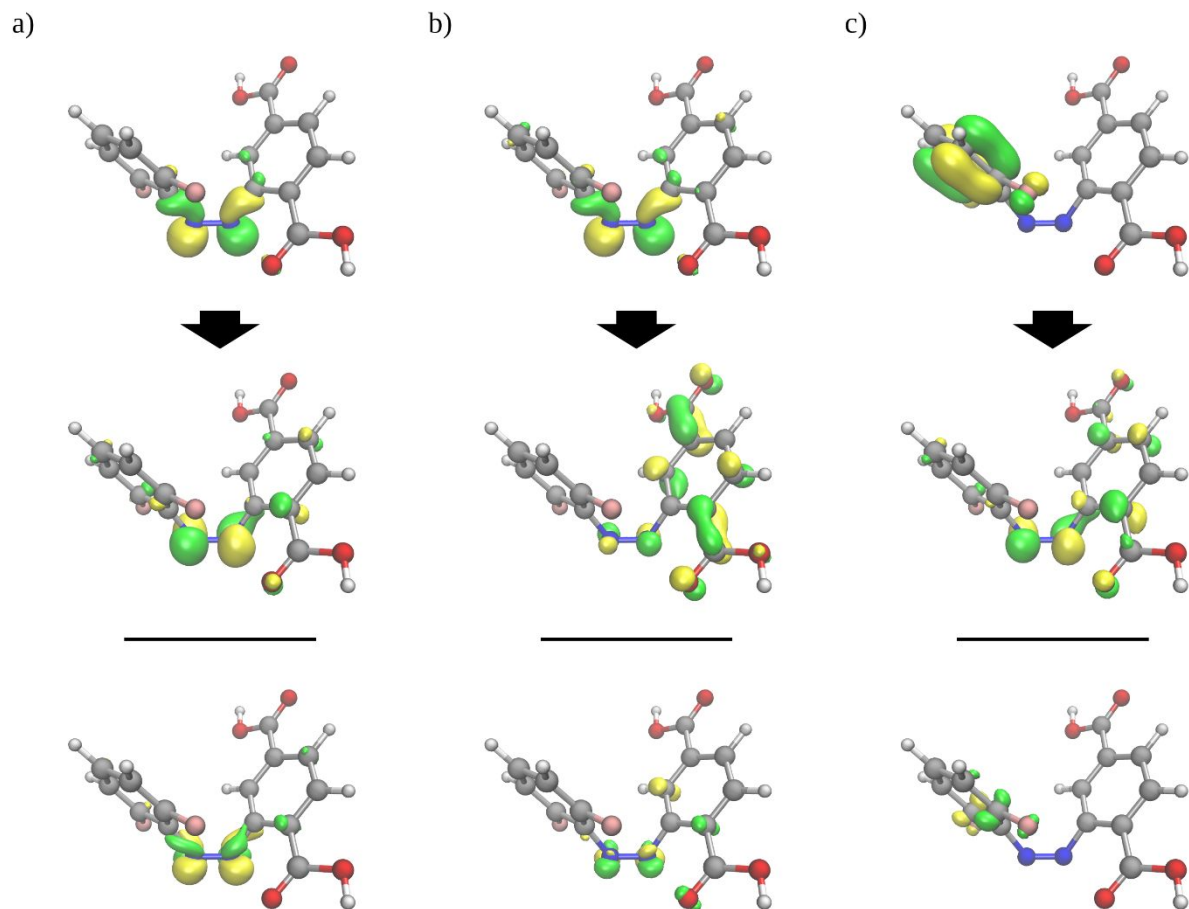

Figure SI4: Calculated transition orbitals and transition densities for the three lowest-lying excitations of *cis*-F<sub>2</sub>AzoBDCH<sub>2</sub>. (a), (b) and (c) correspond to excitations 1, 2 and 3, respectively, in Table SI1. Holes resulting from the excitations are shown in the upper row, the corresponding electrons in the middle row. Yellow and green indicate negative and positive phase, respectively. The bottom row shows the associated transition densities. Here, yellow and green indicate negative and positive phase, respectively.
